# Supplementary material
Source: Springer Nature journal article supplement (https://www.springermedizin.de/resource/supplementary/13584_2013_77_MOESM3_ESM.pdf/9676916)

# Household spending on healthcare(%)

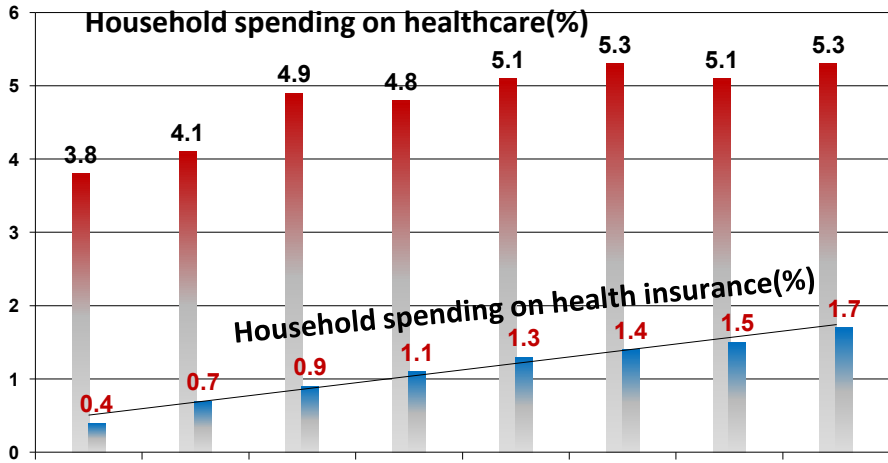

# Household spending on health insurance(%)

Supplement: MOESM3 [file 9676916]
